# Supplementary material for: ‘Don’t forget the mouth!’: a process evaluation of a public oral health project in community-dwelling frail older people
Source: PubMed Central journal article supplement (PMC8522087; doi:10.1186/s12903-021-01884-7), 2021-10-18
Supplement: 12903_2021_1884_MOESM1_ESM.pdf [file 12903_2021_1884_MOESM1_ESM.pdf]

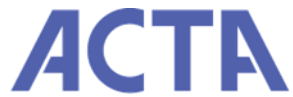

ACADEMIC CENTRE FOR DENTISTRY AMSTERDAM

**'Don't Forget The Mouth !': a process evaluation of a public oral health project in community-dwelling frail older people**

Bach Van Ho<sup>1</sup>, Claar Debora van der Maarel-Wierink<sup>2</sup>, Annemiek Rollman<sup>1</sup>, Roxane Anthea Francesca Weijenberg<sup>1</sup>, Frank Lobbezoo<sup>1</sup>

<sup>1</sup> Department of Orofacial Pain and Dysfunction, Academic Centre for Dentistry Amsterdam (ACTA), University of Amsterdam and Vrije Universiteit Amsterdam, Gustav Mahlerlaan 3004, 1081 LA Amsterdam, The Netherlands

<sup>2</sup> Department of Oral Medicine, Academic Centre for Dentistry Amsterdam (ACTA), University of Amsterdam and Vrije Universiteit Amsterdam, Gustav Mahlerlaan 3004, 1081 LA Amsterdam, The Netherlands

Corresponding author: Bach Van Ho

email address: [b.v.ho@acta.nl](mailto:b.v.ho@acta.nl)

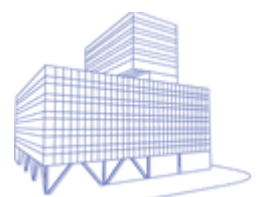

## Additional file 1: General data of the towns

General data of the year 2017 of the towns participating in the project 'Don't forget the mouth!' (DFTM!) from Statistics Netherlands<sup>1</sup>

| Part of The Netherlands | Town | Population (x1.000) | Education level |               |              | Low income (%) |
|-------------------------|------|---------------------|-----------------|---------------|--------------|----------------|
|                         |      |                     | Primary (%)     | Secondary (%) | Tertiary (%) |                |
| North                   | N1   | 108.4               | 27.7            | 39.8          | 30.1         | 7.8            |
|                         | N2   | 89.3                | 23.1            | 32.3          | 44.6         | 5.9            |
|                         | N3   | 844.9               | 22.2            | 27.0          | 48.8         | 13.7           |
|                         | N4   | 67.6                | 28.0            | 42.0          | 28.0         | 9.0            |
|                         | N5   | 88.9                | 25.8            | 33.3          | 40.9         | 8.0            |
|                         | N6   | 15.8                | 33.3            | 41.7          | 25.0         | 4.6            |
|                         | N7   | 23.7                | 33.3            | 38.9          | 22.2         | 4.9            |
| Middle                  | M1   | 48.3                | 25.0            | 36.1          | 36.1         | 3.9            |
|                         | M2   | 21.0                | 31.3            | 43.8          | 25.0         | 3.8            |
|                         | M3   | 22.7                | 29.4            | 41.2          | 23.5         | 4.4            |
|                         | M4   | 16.5                | 25.0            | 41.7          | 33.3         | 5.1            |
|                         | M5   | 36.1                | 22.2            | 40.7          | 33.3         | 4.2            |
| South                   | S1   | 152.4               | 27.4            | 35.0          | 36.8         | 8.3            |
|                         | S2   | 93.3                | 33.8            | 39.4          | 25.4         | 9.0            |
| Average                 |      | 116.4               | 27.7            | 39.8          | 30.1         | 6.6            |
| The Netherlands         |      | 17081.5             | 28.9            | 38.7          | 31.0         | 7.9            |

<sup>1</sup> Statistics Netherlands. Population dynamics; birth, death and migration per region. Available from: <https://opendata.cbs.nl/statline/#/CBS/en/dataset/37259eng/table?ts=1632209741827>  
 Statistics Netherlands. Laag en langdurig laag inkomen; huishoudenskenmerken, regio (indeling 2019). Available from: <https://opendata.cbs.nl/statline/#/CBS/nl/dataset/84641NED/table?ts=1582915219533>  
 Statistics Netherlands. Arbeidsdeelname; regionale indeling 2019. Available from: <https://opendata.cbs.nl/statline/#/CBS/nl/dataset/84703NED/table?ts=1582896098175>
