# Supplementary material for: ‘Don’t forget the mouth!’: a process evaluation of a public oral health project in community-dwelling frail older people
Source: PubMed Central journal article supplement (PMC8522087; doi:10.1186/s12903-021-01884-7), 2021-10-18
Supplement: 12903_2021_1884_MOESM2_ESM.pdf [file 12903_2021_1884_MOESM2_ESM.pdf]

## **'Don't Forget The Mouth !': a process evaluation of a public oral health project in community-dwelling frail older people**

Bach Van Ho<sup>1</sup>, Claar Debora van der Maarel-Wierink<sup>2</sup>, Annemiek Rollman<sup>1</sup>, Roxane Anthea Francesca Weijenberg<sup>1</sup>, Frank Lobbezoo<sup>1</sup>

<sup>1</sup> Department of Orofacial Pain and Dysfunction, Academic Centre for Dentistry Amsterdam (ACTA), University of Amsterdam and Vrije Universiteit Amsterdam, Gustav Mahlerlaan 3004, 1081 LA Amsterdam, The Netherlands

<sup>2</sup> Department of Oral Medicine, Academic Centre for Dentistry Amsterdam (ACTA), University of Amsterdam and Vrije Universiteit Amsterdam, Gustav Mahlerlaan 3004, 1081 LA Amsterdam, The Netherlands

Corresponding author: Bach Van Ho

email address: [b.v.ho@acta.nl](mailto:b.v.ho@acta.nl)

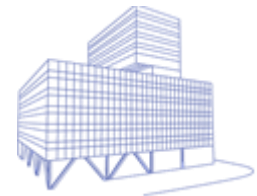

## **Additional file 2: The screening-referral tool**

The screening-referral tool as developed by the project 'Don't forget the mouth!'

The original screening-referral tool is enclosed in Dutch, followed by an English translation.

Patiënt/Cliënt Naam:

M /  V  geboortejaar:

| Gebitssituatie                                                                                                                       |                                                                   |
|--------------------------------------------------------------------------------------------------------------------------------------|-------------------------------------------------------------------|
|                                                                                                                                      | ja/nee/onbekend                                                   |
| Hebt u eigen tanden en/of kiezen?                                                                                                    | <input type="radio"/> <input type="radio"/> <input type="radio"/> |
| Hebt u een volledige gebitsprothese?<br>Bij ja: <input type="checkbox"/> boven <input type="checkbox"/> onder                        | <input type="radio"/> <input type="radio"/> <input type="radio"/> |
| Hebt u een gedeeltelijke gebitsprothese (plaatje of frame)?<br>Bij ja: <input type="checkbox"/> boven <input type="checkbox"/> onder | <input type="radio"/> <input type="radio"/> <input type="radio"/> |
| Hebt u nog eigen tandwortels onder uw gebitsprothese?                                                                                | <input type="radio"/> <input type="radio"/> <input type="radio"/> |
| Hebt u implantaten?                                                                                                                  | <input type="radio"/> <input type="radio"/> <input type="radio"/> |

|                                                                             |                                                                   |
|-----------------------------------------------------------------------------|-------------------------------------------------------------------|
| Hebt u klachten in uw mond, rond uw gebitsprothese of aan uw tanden/kiezen? | <input type="radio"/> <input type="radio"/> <input type="radio"/> |
| Kunt u goed kauwen?                                                         | <input type="radio"/> <input type="radio"/> <input type="radio"/> |
| Draagt u uw gebitsprothese?                                                 | <input type="radio"/> <input type="radio"/> <input type="radio"/> |
| Zit de gebitsprothese los?                                                  | <input type="radio"/> <input type="radio"/> <input type="radio"/> |
| Hebt u een droge mond?                                                      | <input type="radio"/> <input type="radio"/> <input type="radio"/> |
| Hebt u een vieze mondgeur?                                                  | <input type="radio"/> <input type="radio"/> <input type="radio"/> |

## Bezoek aan de mondzorgpraktijk

### Hoe lang geleden bezocht u voor het laatst een mondzorgpraktijk?

- korter dan 1 jaar geleden
- 1-2 jaar geleden
- 2-5 jaar geleden
- langer dan 5 jaar geleden
- onbekend

Norm:

- eigen tanden/kiezen: minimaal elk half jaar;
- volledige gebitsprothese: elk jaar.

### Mag ik u naar de mondzorgverlener verwijzen?

- Ja, te weten naar: naam:
- seniorenproof praktijk
- andere praktijk
- Nee, reden:
  - vind ik niet belangrijk
  - angst voor de tandarts
  - kosten
  - anders, te weten:

### Aandachtspunten voor de mondzorgverlener

- Extra aandacht nodig vanwege geheugen-aandoening
- Extra aandacht nodig vanwege lichamelijke aandoening
- Begeleiding door naaste bij de behandeling nodig: naaste contacteren (zie Verwijsformulier)
- Patiënt kan zich niet verplaatsten, ook niet per taxi: s.v.p. huisbezoek
- Anders, te weten:

## Mondverzorging

### Observatie zelfzorg

|                                                                                                 | ja/nee/onbekend                                                   |
|-------------------------------------------------------------------------------------------------|-------------------------------------------------------------------|
| Poetst de cliënt op eigen initiatief 's ochtends en 's avonds?                                  | <input type="radio"/> <input type="radio"/> <input type="radio"/> |
| Poetst de cliënt op verzoek?                                                                    | <input type="radio"/> <input type="radio"/> <input type="radio"/> |
| Maakt de cliënt effectieve poetsbewegingen?                                                     | <input type="radio"/> <input type="radio"/> <input type="radio"/> |
| Poetst de cliënt de tanden/kiezen en/of de gebitsprothese aan de binnen-, buiten- en bovenkant? | <input type="radio"/> <input type="radio"/> <input type="radio"/> |
| Houdt hij/zij het poetsen tenminste een minuut vol?                                             | <input type="radio"/> <input type="radio"/> <input type="radio"/> |
| Kan de cliënt de mond spoelen?                                                                  | <input type="radio"/> <input type="radio"/> <input type="radio"/> |

### Conclusie

- Zijn niet alle vragen met 'ja' beantwoord? → Hulp is nodig, te weten:
  - toezien op mondverzorging
  - assisteren of overnemen van de mondverzorging
- Zijn alle bovenstaande vragen wel met 'ja' beantwoord? → Geen hulp nodig

### Als er hulp nodig is

|                                                                                                                      | ja / nee                                    |
|----------------------------------------------------------------------------------------------------------------------|---------------------------------------------|
| Is er een mantelzorgverlener die de juiste hulp kan bieden bij de dagelijkse mondverzorging (conform het Poetsboek)? | <input type="radio"/> <input type="radio"/> |
| Hoe staat cliënt tegenover hulp bij de mondverzorging?                                                               |                                             |

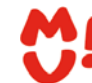

### Gegevens patiënt / cliënt:

Dhr / Mw

Naam: \_\_\_\_\_

Adres: \_\_\_\_\_

Telefoon: \_\_\_\_\_

Geboortedatum: \_\_\_\_\_

BSN: \_\_\_\_\_

### Moet iemand anders gebeld worden om een afspraak te maken?

Nee

Ja, te weten:

Naam: \_\_\_\_\_

Relatie tot patiënt/cliënt: \_\_\_\_\_

Telefoon: \_\_\_\_\_

### Verwijzing: (toelichting in bijbehorend screeningsformulier)

Verwijzing naar mondzorgpraktijk, naam:

Verwijzing naar thuiszorg, naam: \_\_\_\_\_

### **Patiënt / cliënt (of diens wettelijk vertegenwoordiger) geeft toestemming voor deze verwijzing:**

Plaats:

Datum: \_\_\_\_\_

Naam: \_\_\_\_\_

Relatie tot patiënt/cliënt: \_\_\_\_\_

Handtekening: \_\_\_\_\_

### Verwijzer: Naam, functie en contactgegevens verwijzer (stempel mag ook)

Patient/Client

Name:

O M / F O

year of birth:

| Oral health status                                                                                         | yes/no/unknown                                                    |
|------------------------------------------------------------------------------------------------------------|-------------------------------------------------------------------|
| Do you have a natural dentition?                                                                           | <input type="radio"/> <input type="radio"/> <input type="radio"/> |
| Do you have a full dental prosthesis?                                                                      | <input type="radio"/> <input type="radio"/> <input type="radio"/> |
| If Yes, <input type="radio"/> maxillary <input type="radio"/> mandibular                                   | <input type="radio"/> <input type="radio"/> <input type="radio"/> |
| Do you have a partial dental prosthesis?                                                                   | <input type="radio"/> <input type="radio"/> <input type="radio"/> |
| If Yes, <input type="radio"/> maxillary <input type="radio"/> mandibular                                   | <input type="radio"/> <input type="radio"/> <input type="radio"/> |
| Do you have retained roots beneath your prosthesis?                                                        | <input type="radio"/> <input type="radio"/> <input type="radio"/> |
| Do you have dental implants?                                                                               | <input type="radio"/> <input type="radio"/> <input type="radio"/> |
| Do you have complaints in your mouth, in area surrounding your dental prosthesis, or of your teeth/molars? | <input type="radio"/> <input type="radio"/> <input type="radio"/> |
| Can you chew well?                                                                                         | <input type="radio"/> <input type="radio"/> <input type="radio"/> |
| Do you wear your dental prosthesis?                                                                        | <input type="radio"/> <input type="radio"/> <input type="radio"/> |
| Is your dental prosthesis loose?                                                                           | <input type="radio"/> <input type="radio"/> <input type="radio"/> |
| Do you have a dry mouth?                                                                                   | <input type="radio"/> <input type="radio"/> <input type="radio"/> |
| Do you have a bad breath?                                                                                  | <input type="radio"/> <input type="radio"/> <input type="radio"/> |

| Visit to the dental practice                                                                                                               |
|--------------------------------------------------------------------------------------------------------------------------------------------|
| How long ago did you visit a dental practice?                                                                                              |
| <input type="radio"/> < 1 year                                                                                                             |
| <input type="radio"/> 1-2 years                                                                                                            |
| <input type="radio"/> 2-5 years                                                                                                            |
| <input type="radio"/> >5 years                                                                                                             |
| <input type="radio"/> Unknown                                                                                                              |
| May I refer you to an oral health care professional?                                                                                       |
| <input type="radio"/> Yes, to:                                                                                                             |
| <input type="radio"/> a senior-proof practice                                                                                              |
| <input type="radio"/> another practice                                                                                                     |
| <input type="radio"/> No, because:                                                                                                         |
| <input type="radio"/> I don't think it is important                                                                                        |
| <input type="radio"/> fear of an oral health care professional                                                                             |
| <input type="radio"/> costs                                                                                                                |
| <input type="radio"/> other, namely:                                                                                                       |
| <b>Points of attention for the oral health care professional</b>                                                                           |
| <input type="radio"/> attention needed because of a cognitive decline                                                                      |
| <input type="radio"/> attention needed because a physical decline                                                                          |
| <input type="radio"/> informal caregiver needed for guidance during the treatment: contact with the informal caregiver (see Referral form) |
| <input type="radio"/> patient cannot be displaced, also not with a taxi service: please home visit                                         |
| <input type="radio"/> other, namely:                                                                                                       |

Norm:  
- Natural dentition: minimally once every 6 months  
- Complete dental prostheses: each year

Name:

| Oral hygiene care                                                                                            | yes/no/unknown                                                    |
|--------------------------------------------------------------------------------------------------------------|-------------------------------------------------------------------|
| <u>Observation of daily oral hygiene self-care</u>                                                           |                                                                   |
| Does the client brush on his/her own initiative in the morning and evening?                                  | <input type="radio"/> <input type="radio"/> <input type="radio"/> |
| Does the client brush on request?                                                                            | <input type="radio"/> <input type="radio"/> <input type="radio"/> |
| Does the client make effective brush movements?                                                              | <input type="radio"/> <input type="radio"/> <input type="radio"/> |
| Does the client brush the teeth/molars and/or dental prosthesis on three sides (inside, outside and upside)? | <input type="radio"/> <input type="radio"/> <input type="radio"/> |
| Does he/she carry on brushing at least one minute?                                                           | <input type="radio"/> <input type="radio"/> <input type="radio"/> |
| Can the client rinse the mouth?                                                                              | <input type="radio"/> <input type="radio"/> <input type="radio"/> |
| <u>Conclusion</u>                                                                                            |                                                                   |
| <input type="radio"/> <u>Not</u> all the questions are answered with yes → Support is needed with:           |                                                                   |
| <input type="radio"/> Monitoring oral hygiene care                                                           |                                                                   |
| <input type="radio"/> Assistance with, or taking over, oral hygiene care                                     |                                                                   |
| <input type="radio"/> <u>All</u> questions above are answered with yes → no support is needed                |                                                                   |
| <u>If support is needed</u>                                                                                  |                                                                   |
| Is there an informal caregiver who could provide the correct support with daily oral hygiene care?           |                                                                   |
| <input type="radio"/> yes <input type="radio"/> no                                                           |                                                                   |
| What is the client's opinion about support in daily oral hygiene?                                            |                                                                   |

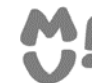

**Data of the patient/client:**

Mr./Mrs.

Name

Address

Telephone

Birth date

Social Security Number

**Does someone else need to be called for making an appointment?**

No

Yes, namely :

Name:

Relation with patient/client:

Telephone

**Referral** (explanation corresponding to screening form)

Referral to dental practice, name:

Referral to home care organization, name:

**Referrer:**

Name, function and contact details referrer (stamp also valid)

**Patient/ client (or their legal representative) gives permission for this referral:**

Place

Date

Name

Relation with patient/client

Signature
