# Supplementary material for: ‘Don’t forget the mouth!’: a process evaluation of a public oral health project in community-dwelling frail older people
Source: PubMed Central journal article supplement (PMC8522087; doi:10.1186/s12903-021-01884-7), 2021-10-18
Supplement: 12903_2021_1884_MOESM3_ESM.pdf [file 12903_2021_1884_MOESM3_ESM.pdf]

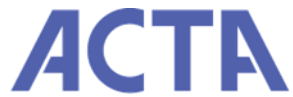

ACADEMIC CENTRE FOR DENTISTRY AMSTERDAM

**'Don't Forget The Mouth !': a process evaluation of a public oral health project in community-dwelling frail older people**

Bach Van Ho<sup>1</sup>, Claar Debora van der Maarel-Wierink<sup>2</sup>, Annemiek Rollman<sup>1</sup>, Roxane Anthea Francesca Weijenberg<sup>1</sup>, Frank Lobbezoo<sup>1</sup>

<sup>1</sup> Department of Orofacial Pain and Dysfunction, Academic Centre for Dentistry Amsterdam (ACTA), University of Amsterdam and Vrije Universiteit Amsterdam, Gustav Mahlerlaan 3004, 1081 LA Amsterdam, The Netherlands

<sup>2</sup> Department of Oral Medicine, Academic Centre for Dentistry Amsterdam (ACTA), University of Amsterdam and Vrije Universiteit Amsterdam, Gustav Mahlerlaan 3004, 1081 LA Amsterdam, The Netherlands

Corresponding author: Bach Van Ho

email address: [b.v.ho@acta.nl](mailto:b.v.ho@acta.nl)

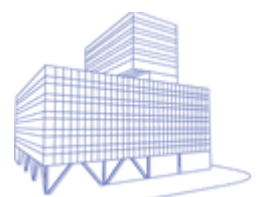

### Additional file 3: Determined topics for semi-structured interviews

Determined topics for semi-structured interviews about the implementation process and to identify factors for success and barriers of the project 'Don't forget the mouth!' (DFTM!)

| Topics                                                                                       | Sub topics                                                                                                                      |
|----------------------------------------------------------------------------------------------|---------------------------------------------------------------------------------------------------------------------------------|
| Implementation of the project DFTM!                                                          |                                                                                                                                 |
| Expectations                                                                                 |                                                                                                                                 |
| The population cared for by the health care professionals (factors for success and barriers) |                                                                                                                                 |
| Collaborations (factors for success and barriers)                                            |                                                                                                                                 |
| DFTM! (factors for success and barriers )                                                    | Education<br>Website<br>Materials: screening-referral tool, brush book, leaflets, daily oral hygiene care products, and website |
| Outcome                                                                                      | Roadmap of the project DFTM!<br>Referral<br>Screening<br>Meeting (Multi-Disciplinary Meeting)                                   |
| Describe situation                                                                           | Intake<br>Daily oral hygiene care routine                                                                                       |
| Attitude towards the project DFTM!                                                           |                                                                                                                                 |
| Future                                                                                       |                                                                                                                                 |
| <b>Additional subject</b>                                                                    |                                                                                                                                 |
| Financial issues                                                                             |                                                                                                                                 |
